# Supplementary material
Source: Frontiers journal article supplement (https://www.frontiersin.org/articles/435611)
Supplement: Data_Sheet_1.PDF [file Data_Sheet_1.PDF]

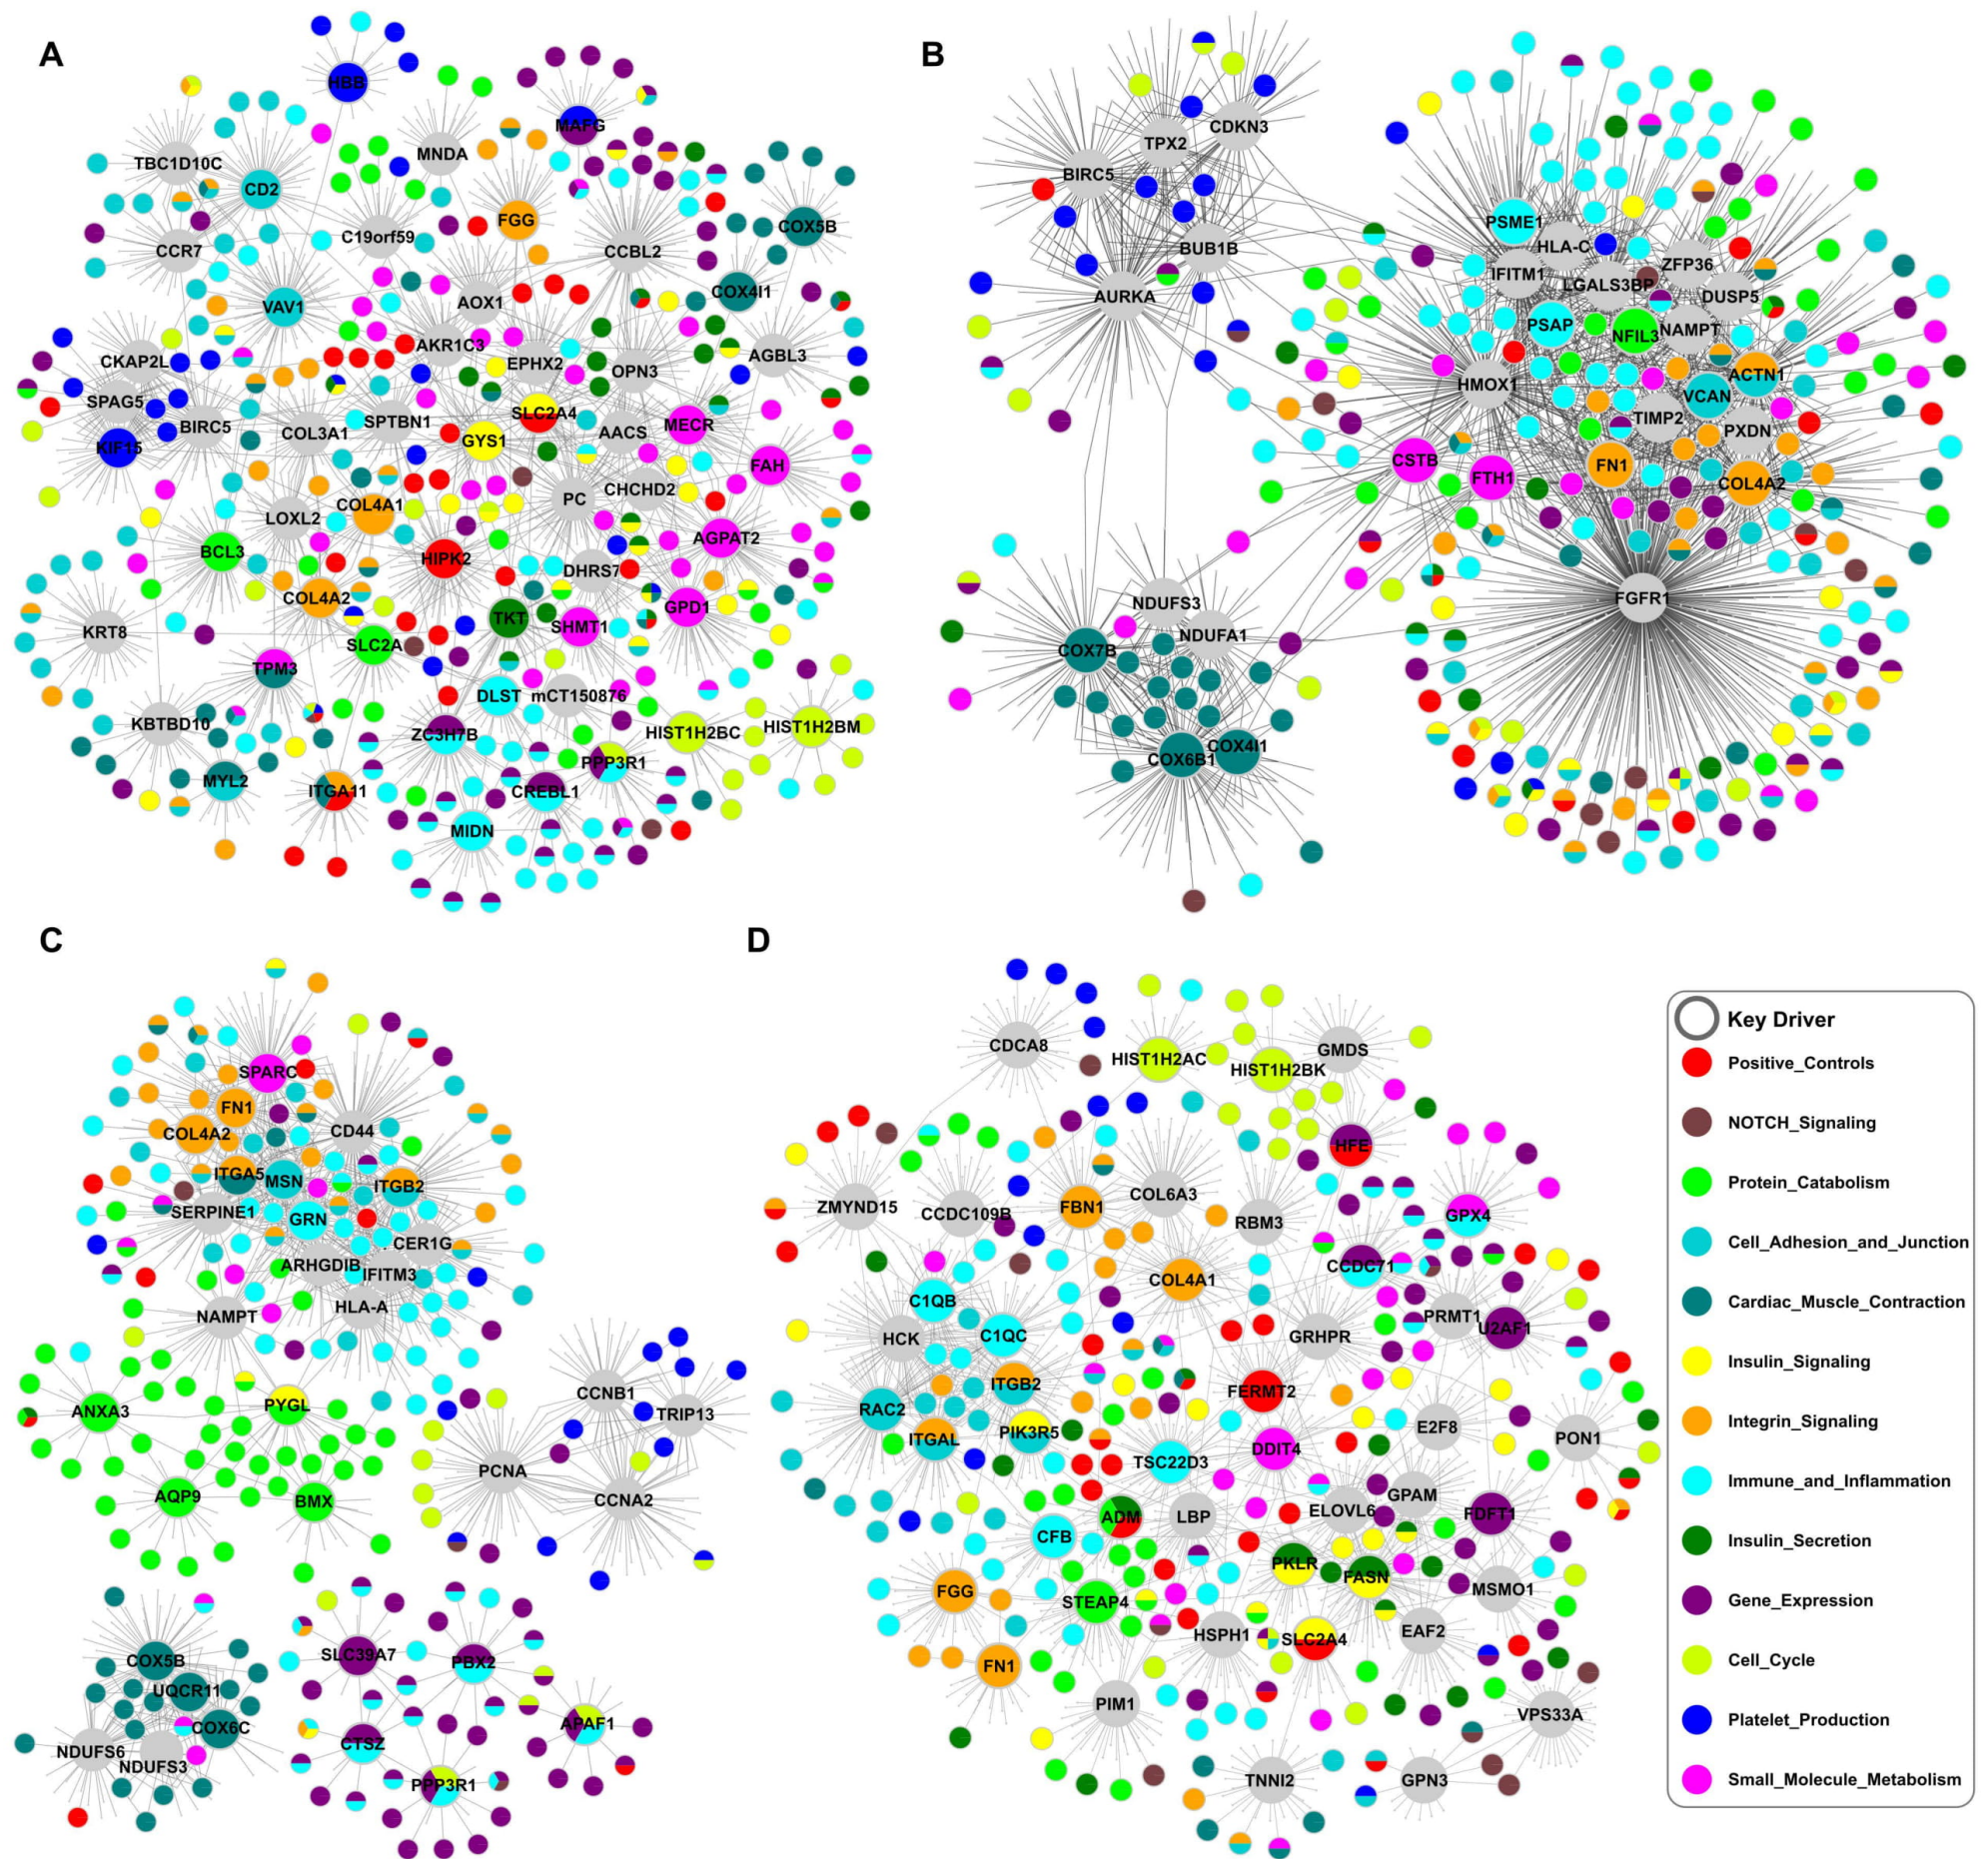

**Supplementary Figure 1.** The tissue-specific gene regulatory networks of the top KDs of BP. Panel A-D represent networks in adipose, artery, blood, and liver separately. We scaled the nodes according to the following criteria: the largest nodes are key driver genes; the middle-size nodes in color are member genes from the pathways/coexpression modules; and the smallest nodes are nonmember genes that are only slightly wider than their edges. Only the supersets/pathways with >100 genes are illustrated.
